# Supplementary material for: Metformin Reduces Lipotoxicity-Induced Meta-Inflammation in β-Cells through the Activation of GPR40-PLC-IP3 Pathway
Source: Hindawi journal article supplement (doi:10.1155/2019/7602427), 2019-12-19
Supplement: f1 [file 7602427.f1.pdf]

## Supplementary Material 1

### Metformin improved beta cell function independent of weight and insulin resistance

In order to further explain the effect of metformin on islet beta-cell function, we used covariance analysis to control the effects of weight and insulin resistance, and we analyzed the effect of metformin on islet  $\beta$  cells function. As shown in Table 1, after controlling weight and insulin resistance, the AUC of IPGTT, AUC of ITT and the popnosis of pancreatic cell in the MF+HFD group were lower than those of the HFD group, while the HOMA- $\beta$  was elevated ( $P < 0.05$ ).

**Table 1 - Effect of metformin on high fat diet induced islet dysfunction in obese rats**

|                                                      | NC                | MF               | HFD                           | MF+HFD                         | P value |
|------------------------------------------------------|-------------------|------------------|-------------------------------|--------------------------------|---------|
| <b>Fasting blood-glucose (mmol/L)</b>                | 8.0 $\pm$ 2.2     | 7.9 $\pm$ 3      | 11.98 $\pm$ 2.1               | 8.1 $\pm$ 1.6                  |         |
| <b>Fasting blood-insulin (<math>\mu</math>IU/ml)</b> | 4.94 $\pm$ 0.81   | 4.70 $\pm$ 1.0   | 6.18 $\pm$ 0.83               | 4.84 $\pm$ 1.1                 |         |
| <b>AUC of IPGTT</b>                                  | 1056 $\pm$ 38.38  | 936 $\pm$ 38.21  | 1707 $\pm$ 37.56 <sup>a</sup> | 1349 $\pm$ 33.07 <sup>ab</sup> | <0.05   |
| <b>AUC of ITT</b>                                    | 738.6 $\pm$ 27.92 | 684 $\pm$ 30.86  | 1110 $\pm$ 47.36 <sup>a</sup> | 870 $\pm$ 27.5 <sup>ab</sup>   | <0.05   |
| <b>HOMA-<math>\beta</math></b>                       | 0.26 $\pm$ 0.05   | 0.29 $\pm$ 0.046 | 0.12 $\pm$ 0.049 <sup>a</sup> | 0.22 $\pm$ 0.059 <sup>ab</sup> | <0.05   |
| <b>Apoptosis (%)</b>                                 | 9.8 $\pm$ 0.8     | 8.8 $\pm$ 0.7    | 28 $\pm$ 0.9 <sup>a</sup>     | 12.5 $\pm$ 1 <sup>ab</sup>     | <0.05   |

<sup>a</sup>p < 0.05 vs.NC group , <sup>b</sup>P < 0.05 vs. HFD group.
